# Supplementary material
Source: publisher figshare collection journal article supplement (https://tandf.figshare.com/ndownloader/files/14826023)
Supplement: Supplementary file 1 [file 14826023]

**Supplementary table 1**

VOLUME EQUATIONS (FSI, 1996; 2009; 2012; 2015)

| **Scientific Name** | **Local Name** | **Volume equation** |
| --- | --- | --- |
| *Aesculus indica* | Khanor | √V = 0.220191 + 3.923711 D — 1.117475 √D |
| *Albizzia procera* | Safed Siris | √V= — 0.07109 + 2.99732 D — 0.26953 √ D |
| *Alnus nepalensis* | Kunish | V = 0.193297—2.267002 D + 10.679492D2 |
| *Bauhinia variegata* | Kachnar | V/D2 = 0.007602/D2 — 0.033037/D + 1.868567 + 4.483454 D |
| *Bombax ceiba* | Semal | V/D2 = 0.007602/D2 — 0.033037/D + 1.868567 + 4.483454 D |
| *Carya illinoenensis* | Pecanut | V/D2 = 0.007602/D2 — 0.033037/D + 1.868567 + 4.483454 D |
| *Cedrus deodara* | Deyar | V = 0.06168+0.27696* D2H |
| *Cupressus torulosa* | Siyar | V = 0.087+0.289* D2H |
| *Dalbergia sissoo* | Tali | V = — 0.013703 + 3.943499 D2 |
| *Emblica officinalis* | Amla | V = 0.13734 — 2.49039 D + 15.59566 D2 +11.06205 D3 |
| *Ficus palmata* | Bhedu | √V = 0.03629 + 3.95389 D – 0.84421√D |
| *Ficus roxburghii* | Timla | √V = 0.03629 + 3.95389 D – 0.84421√D |
| *Grewia optiva* | Bihul/Dhaman | V/D2 = 0.007602/D2 – 0.033037/D + 1.868567 + 4.483454 D |
| *Juglans regia* | Akhrot | √V = 0.207299 + 3.254007 D |
| *Lyonia ovalifolia* | Ayar | V = 0.03468-0.56878D + 4.72286D2 |
| *Mangifera indica* | Mango | V/D2 = 0.007602/D2 – 0.033037/D + 1.868567 + 4.483454 D |
| *Melia azadirach* | Drek | V = – 0.03510 + 5.32981 D2 |
| *Pinus roxburghii* | Chirpine | √ V = 0.05131 + 3.9859D – 1.0245√D |
| *Prunus armeniaca* | Chuli | V = 0.193297– 2.267002 D + 10.679492D2 |
| *Prunus Cerassoides* | Paza | V = 0.193297– 2.267002 D + 10.679492D2 |
| *Q. leucotrichophora* | Banj | √V = 0.240157 + 3.820069 D – 1.394520 √D |
| *Rhododendron arboreum* | Burans | V = 0.06007 – 0.21874√ D + 3.63428D2 |
| *Toona ciliata* | Toon | V= 1.10314 – 3.52579√ D + 15.50182D2 |

**Supplementary figures**

A

B


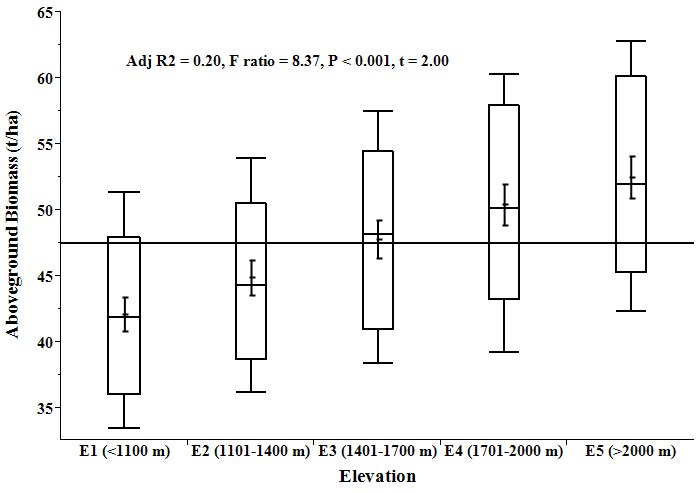
 **
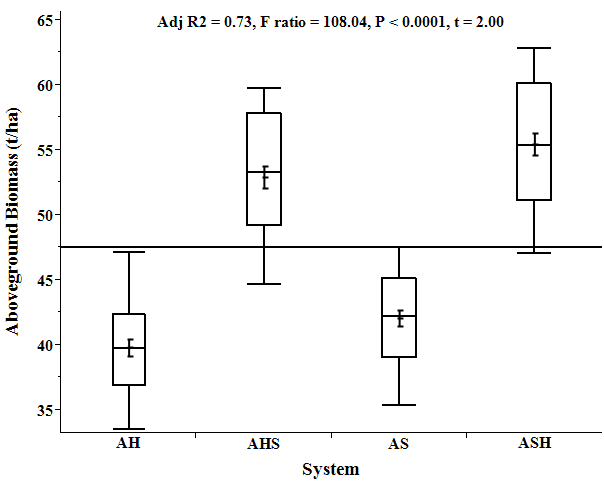
**

Figure S.1. Effect of elevation and systems on aboveground biomass of vegetation in traditional agroforestry systems. (AH = Agrihorticulture, AHS = Agrihortisilviculture, AS = Agrisilviculture, ASH = Agrisilvihorticulture; E1 = < 1100 m, E2 = 1101-1400 m, E3 = 1401-1700 m, E4 = 1701-2000 m, E5 = > 2000 m).

A

B


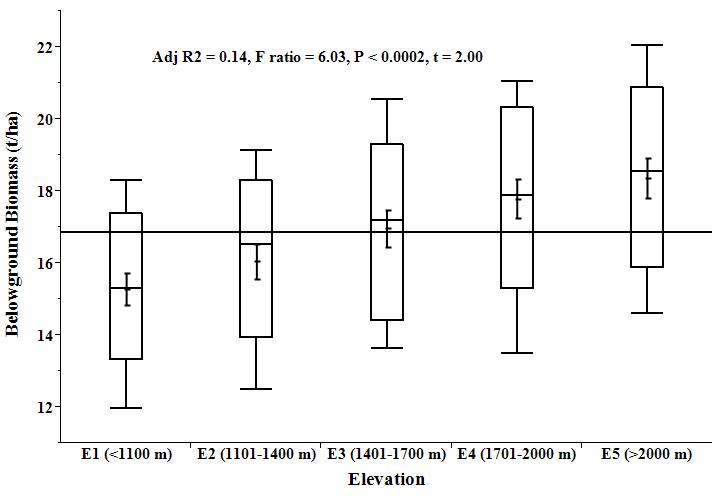

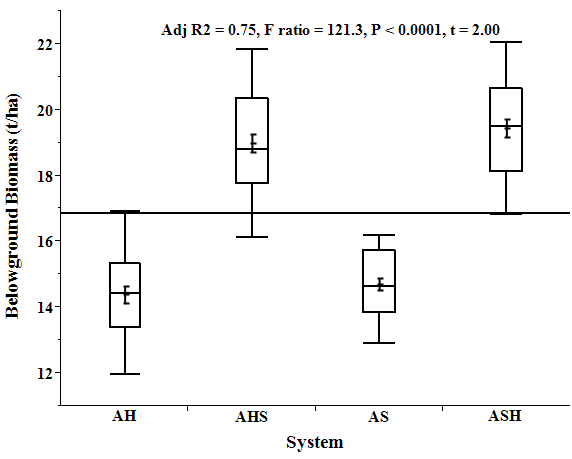


Figure S.2. Effect of elevation and systems on belowground biomass of vegetation in traditional agroforestry systems. (AH = Agrihorticulture, AHS = Agrihortisilviculture, AS = Agrisilviculture, ASH = Agrisilvihorticulture; E1 = < 1100 m, E2 = 1101-1400 m, E3 = 1401-1700 m, E4 = 1701-2000 m, E5 = > 2000 m).


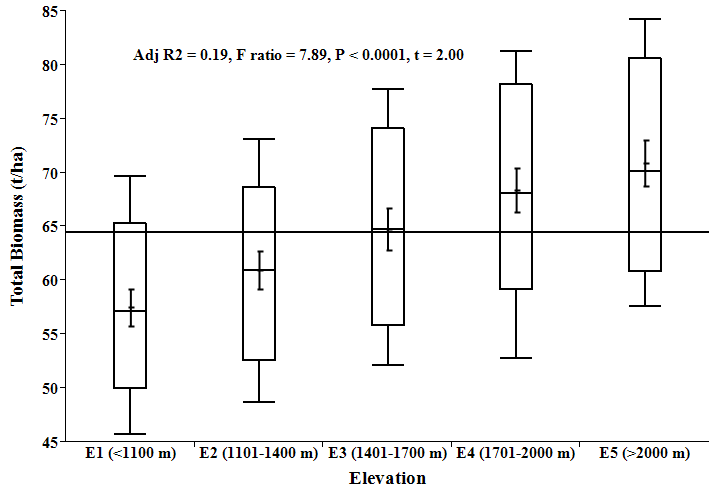

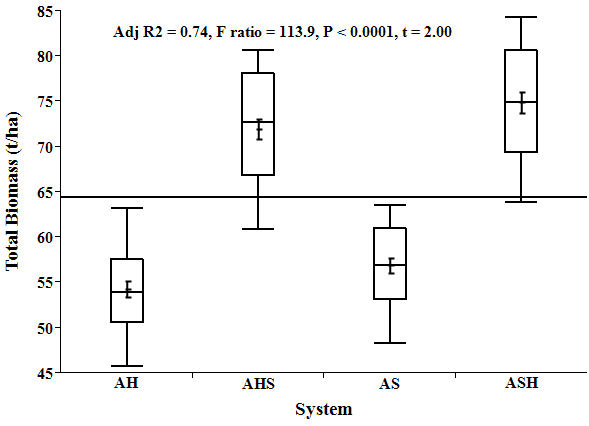


A

B

Figure S.3. Effect of elevation and systems on total biomass of vegetation in traditional agroforestry systems (AH = Agrihorticulture, AHS = Agrihortisilviculture, AS = Agrisilviculture, ASH = Agrisilvihorticulture; E1 = < 1100 m, E2 = 1101-1400 m, E3 = 1401-1700 m, E4 = 1701-2000 m, E5 = > 2000 m).

A

B


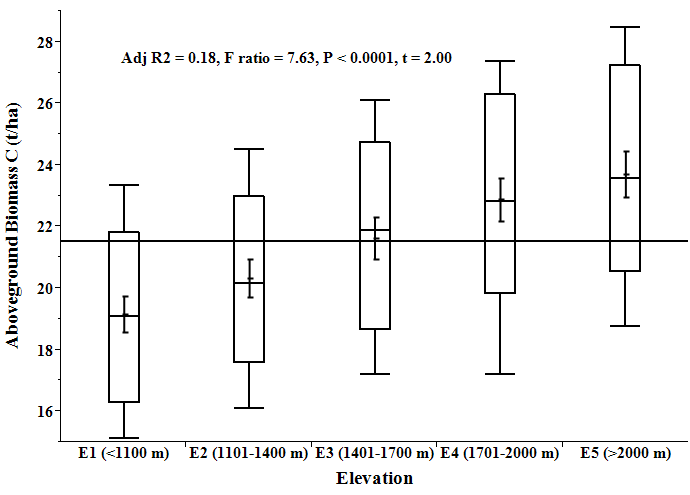

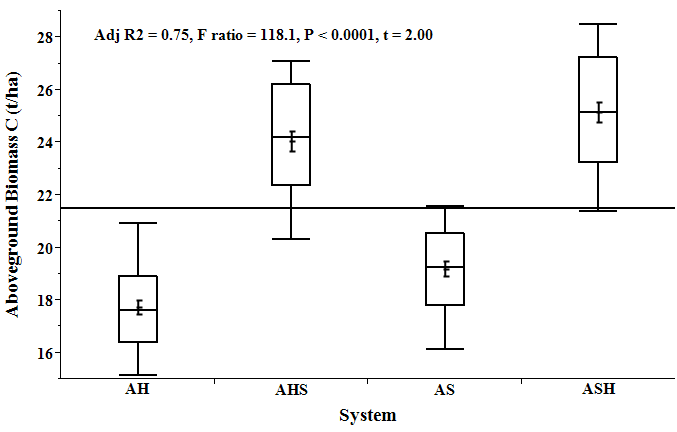


Figure S.4. Effect of elevation and systems on aboveground biomass C of vegetation in traditional agroforestry systems (AH = Agrihorticulture, AHS = Agrihortisilviculture, AS = Agrisilviculture, ASH = Agrisilvihorticulture; E1 = < 1100 m, E2 = 1101-1400 m, E3 = 1401-1700 m, E4 = 1701-2000 m, E5 = > 2000 m).


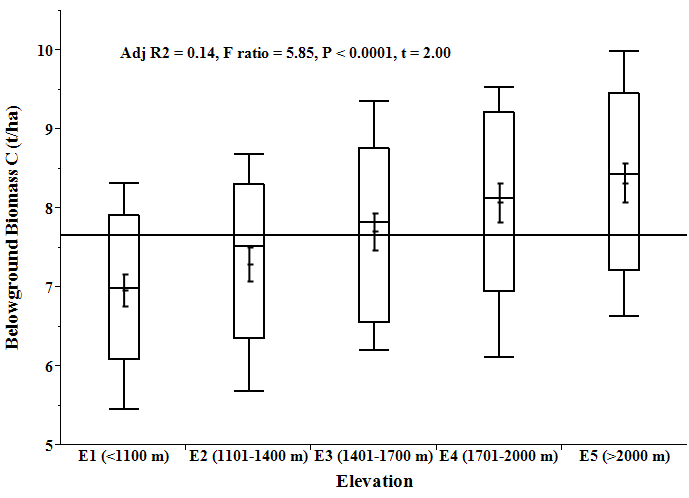

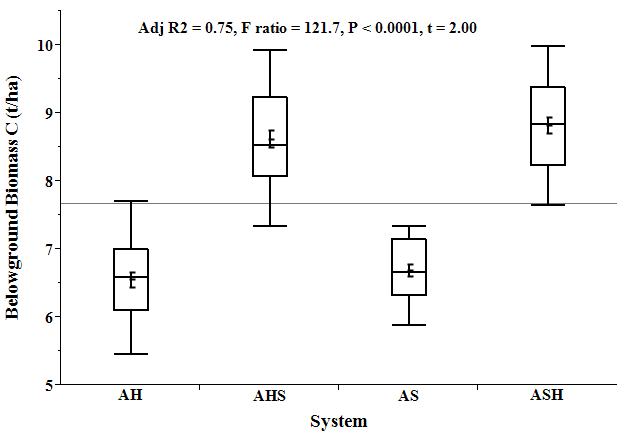


A

B

Figure S.5. Effect of elevation and systems on belowground biomass C of vegetation in traditional agroforestry systems (AH = Agrihorticulture, AHS = Agrihortisilviculture, AS = Agrisilviculture, ASH = Agrisilvihorticulture; E1 = < 1100 m, E2 = 1101-1400 m, E3 = 1401-1700 m, E4 = 1701-2000 m, E5 = > 2000 m).

A

B


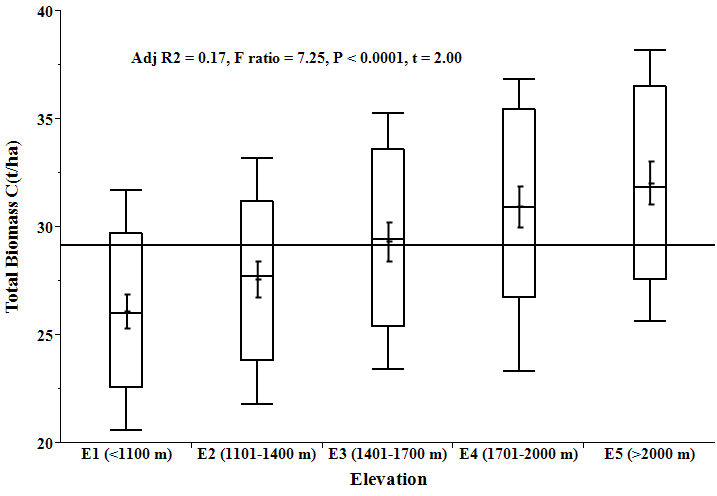

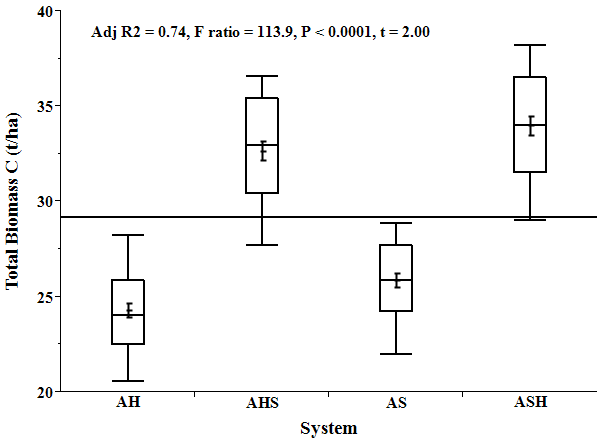


**Adj R2 = 0.75, F ratio = 123.0, P < 0.0001, t = 2.00**

Figure S.6. Effect of elevation and systems on total biomass C of vegetation in traditional agroforestry systems (AH = Agrihorticulture, AHS = Agrihortisilviculture, AS = Agrisilviculture, ASH = Agrisilvihorticulture; E1 = < 1100 m, E2 = 1101-1400 m, E3 = 1401-1700 m, E4 = 1701-2000 m, E5 = > 2000 m).
